# Supplementary material
Source: PubMed Central journal article supplement (PMC7194175)
Supplement: NIHMS1582319-supplement-SI.pdf [file NIHMS1582319-supplement-SI.pdf]

1 **Supplementary Data**

2

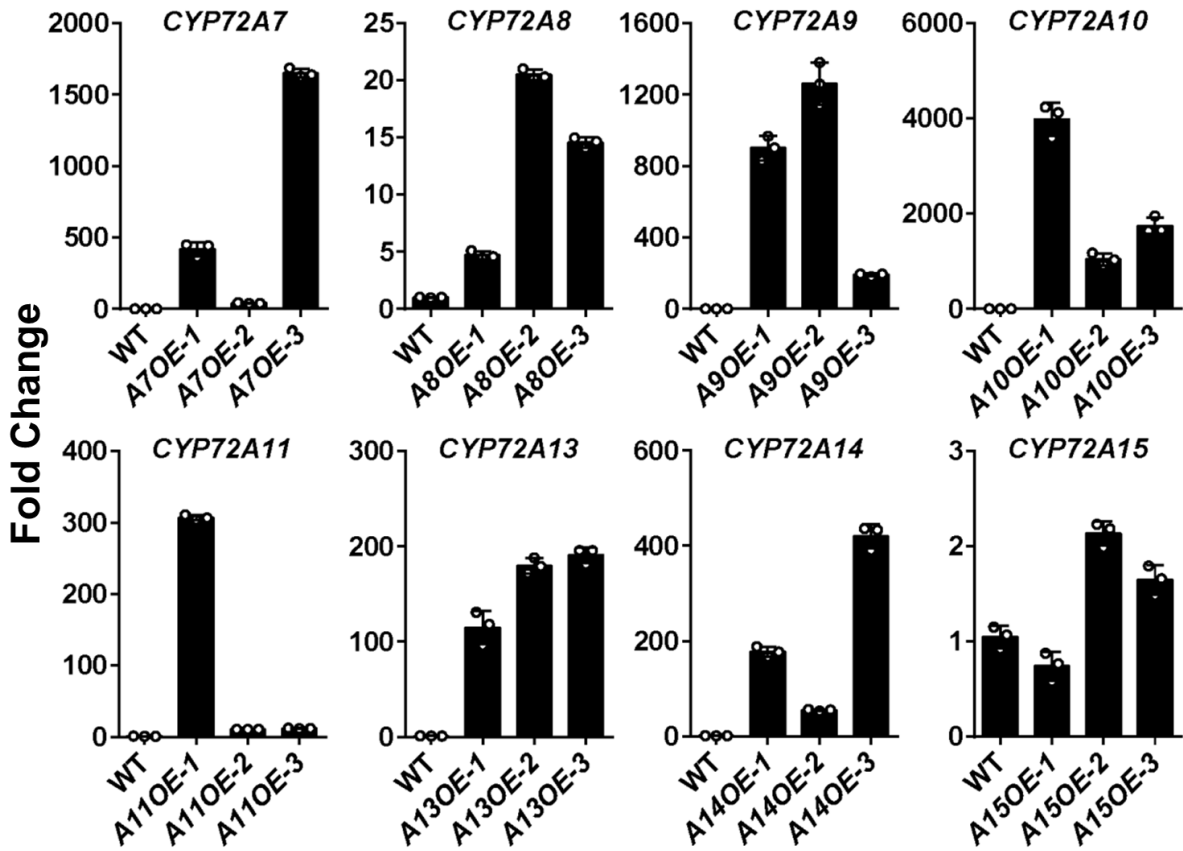

3

4 **Supplementary Fig. 1** qRT-PCR analysis of each *AtCYP72* gene in the 10-day-old seedlings of the  
5 **corresponding *AtCYP72A*-overexpressing *Arabidopsis***. Three independent homozygous lines for each *AtCYP72A*  
6 gene were analyzed, and *Actin 2* (*At3g18780*) was used as a reference gene in the analysis. The expression level of  
7 each *AtCYP72* in WT was set as 1.0. Error bars represent means  $\pm$ SDs ( $n = 3$  biologically independent samples).

8

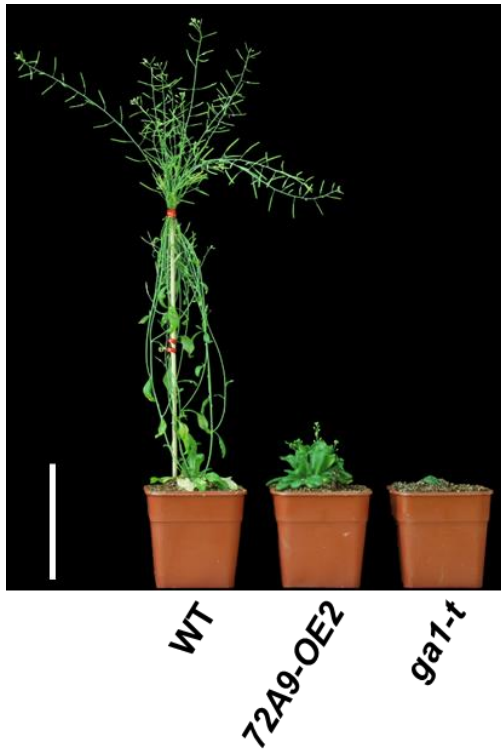

- 1
- 2 **Supplementary Fig. 2 Phenotypes of adult plants (8 weeks old) of WT, 72A9-OE2, and *ga1-t*.** Scale bar = 10 cm.
- 3 This experiment was repeated three times with similar results.

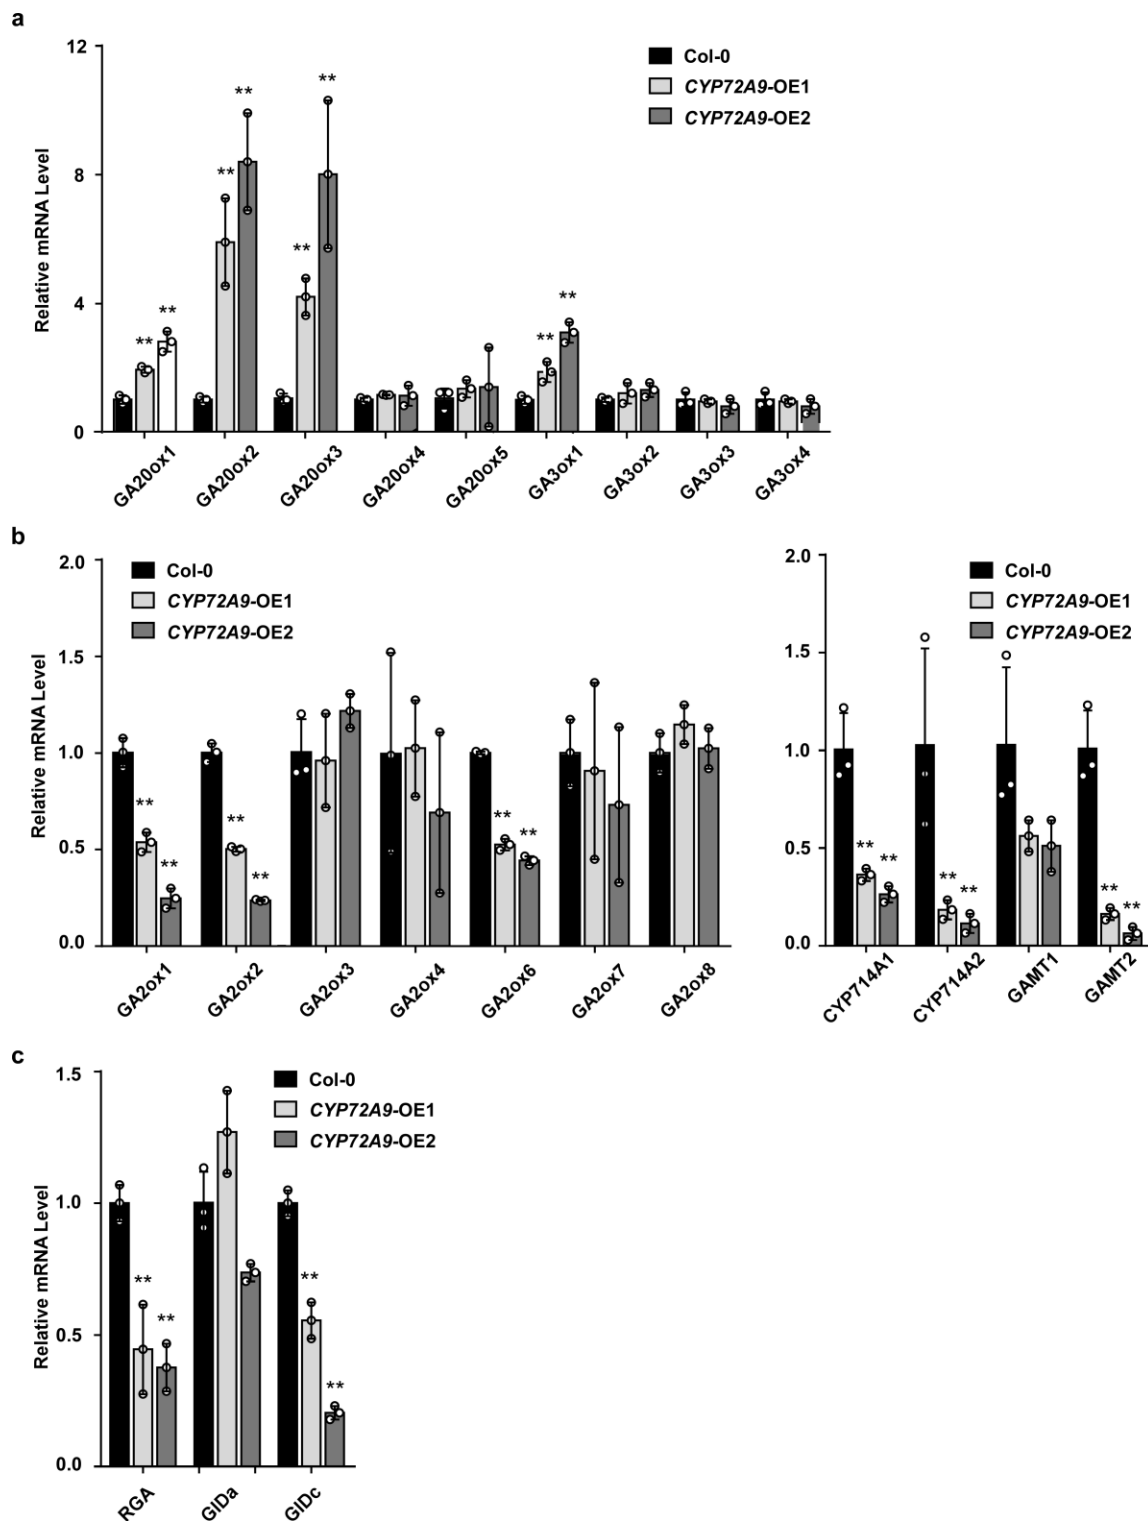

1  
2 **Supplementary Fig. 3 Quantitative RT-PCR (qRT-PCR) analysis of GA metabolism and signaling genes in**  
3 **WT and CYP72A9-OE lines.** The plant samples (rosette leaves of 4-week-old Arabidopsis) used here were the  
4 same as those used in Fig. 2c. *At1g13320*, *At4g26410*, and *At5g46630* were used as reference genes in this analysis.  
5 The values are presented as the means  $\pm$  SDs ( $n = 3$  biologically independent samples). The transcript level of each

1 tested gene in WT was set as 1.0. \*\*,  $P < 0.01$  (two-tailed Student's  $t$ -test), significantly different from wild-type  
2 (Col-0).

3 A. qRT-PCR analysis of GA biosynthesis genes (*GA20ox1*, *At4G25420*; *GA20ox2*, *At5G51810*; *GA20ox3*,  
4 *At5G07200*; *GA20ox4*, *At1G60980*; *GA3ox1*, *At1G15550*; *GA3ox2*, *At1G80340*; *GA3ox3*, *At4G21690*; *GA3ox4*,  
5 *At1G80330*) in the WT and two *CYP72A9*-OE lines.

6 B. qRT-PCR analysis of GA deactivation genes (*GA2ox1*, *At1G78440*; *GA2ox2*, *At1G30040*; *GA2ox3*, *At2G34555*;  
7 *GA2ox4*, *At1G47990*; *GA2ox6*, *At1G02400*; *GA2ox7*, *At1G50960*; *GA2ox8*, *At4G21200*; *CYP714A1*, *At5G24910*;  
8 *CYP714A2*, *At5G24900*; *GAMT1*, *At4G26420*; *GAMT2*, *At5G56300*) in the WT and two *CYP72A9*-OE lines.

9 C. qRT-PCR analysis of GA signaling genes (*RGA*, *At2G01570*; *GID1a*, *At3G05120*; *GID1c*, *At5G27320*) in the  
10 WT and two *CYP72A9*-OE lines.

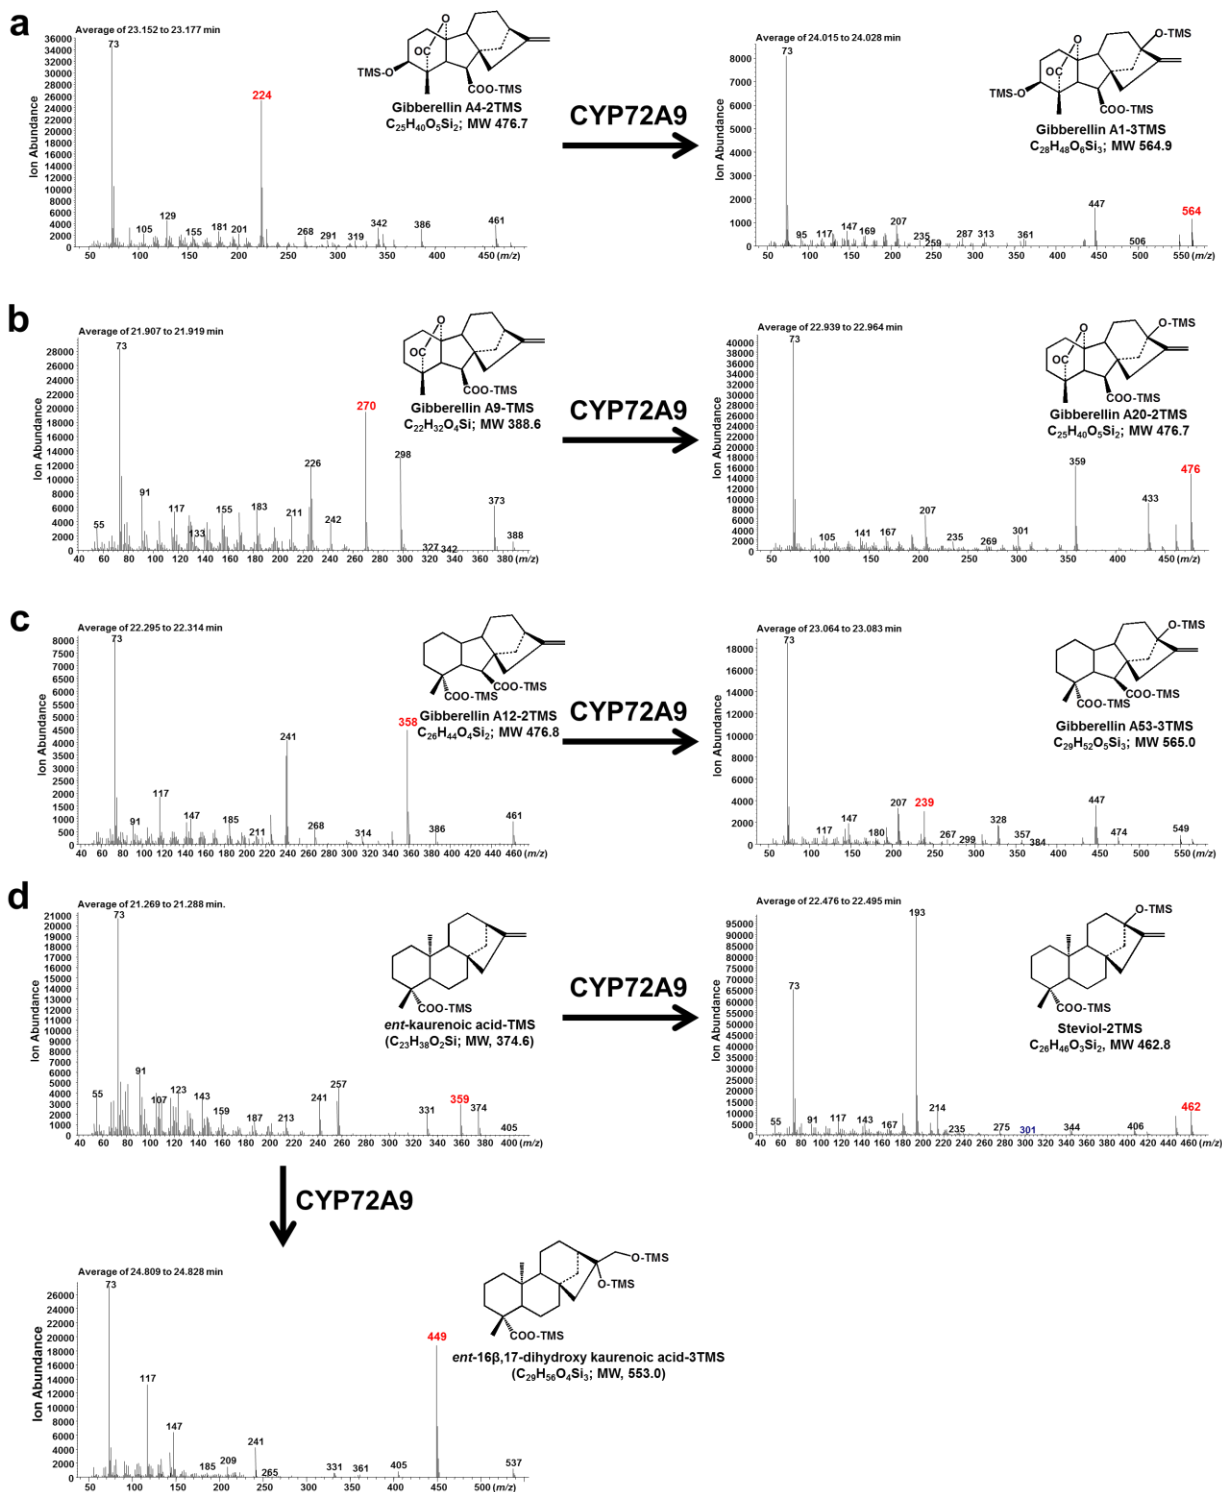

1  
2 **Supplementary Fig. 4 Mass spectra (GC-MS) of the trimethylsilyl esters of the chemical standards used in**  
3 **this study.** The  $m/z$  number used in SIM scanning of different chemicals is marked in red. This experiment was  
4 repeated three times with similar results.

1

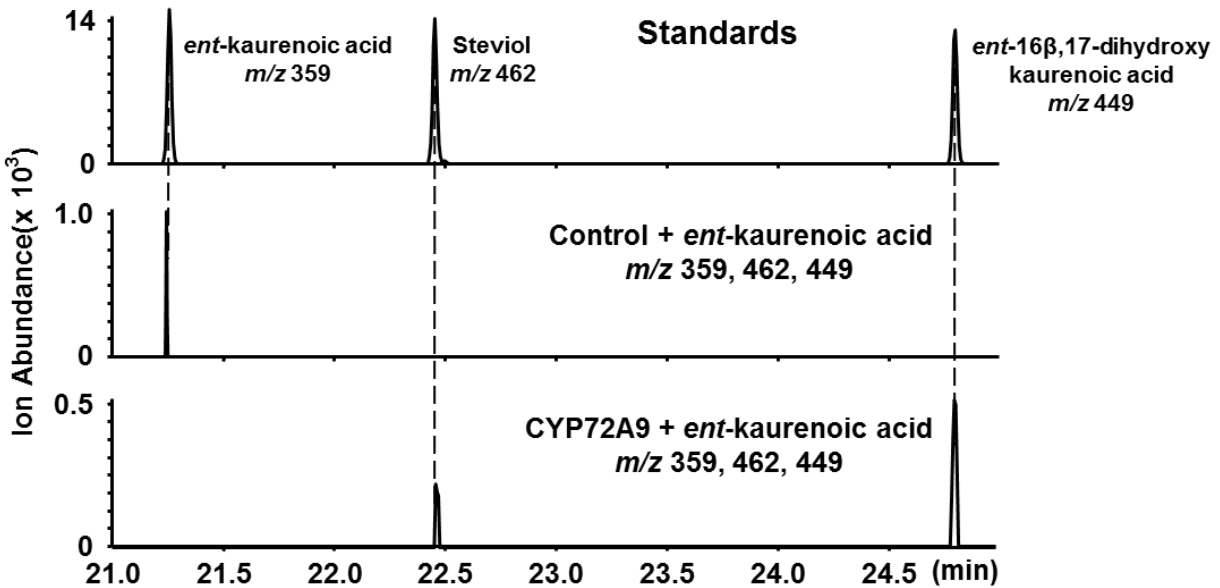

2

3 **Supplementary Fig. 5 CYP72A9 oxidizes *ent*-kaurenoic acid to produce steviol and *ent*-16 $\beta$ ,17- dihydroxy**  
4 **kaurenoic acid.** Chromatogram of selected ions of  $m/z$  359 for *ent*-kaurenoic acid,  $m/z$  462 for steviol, and  $m/z$  449  
5 for *ent*-16 $\beta$ ,17- dihydroxy kaurenoic acid (see Supplementary Fig. 4d). It is noteworthy that the y axis scale for each  
6 reaction is arbitrary and provided for clarity. This experiment was repeated three times with similar results.

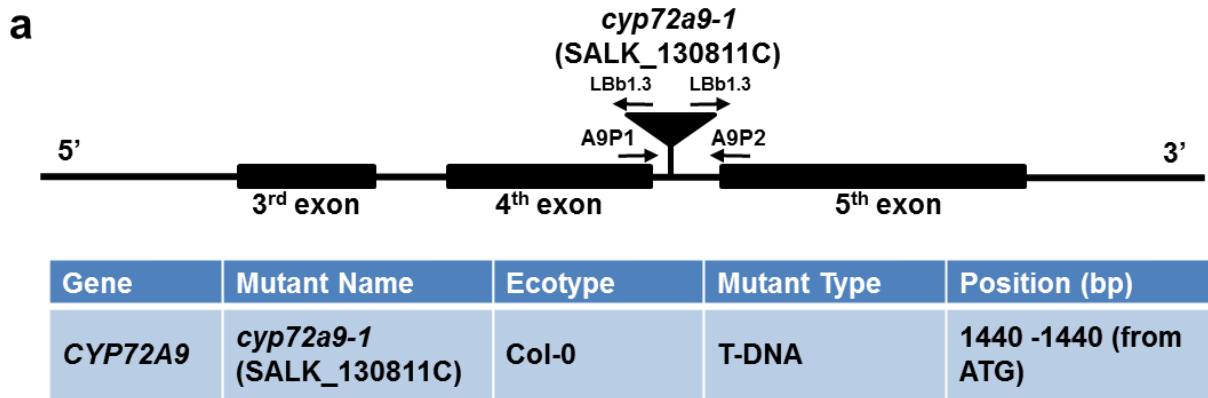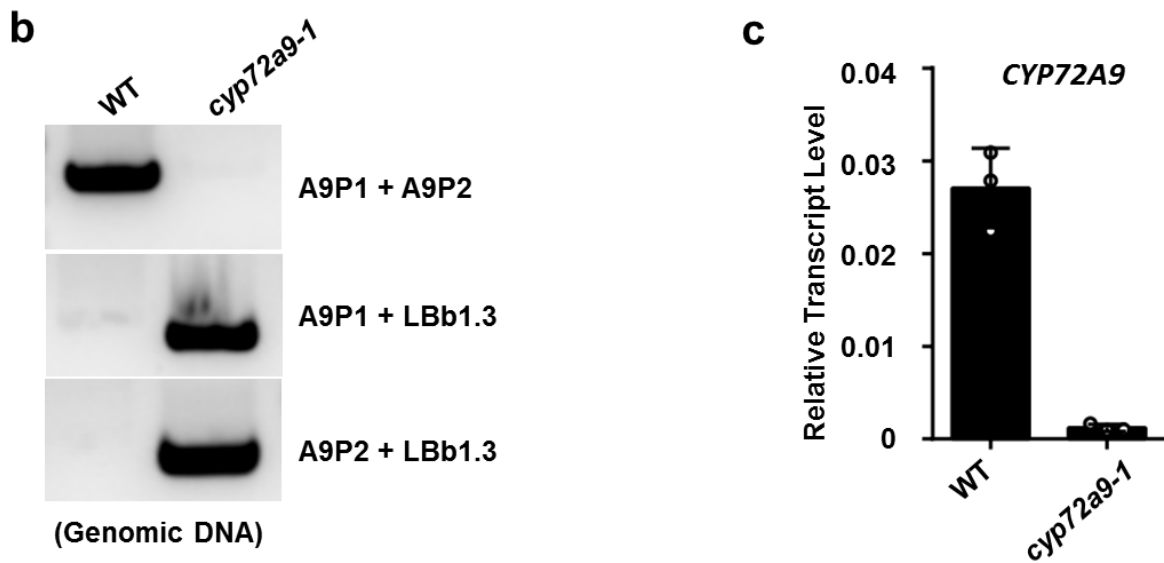

1

2 **Supplementary Fig. 6 Characterization of the *CYP72A9* T-DNA insertion mutant.**

3 **a.** The positions of T-DNA insertions, which are marked on the gene model of *CYP72A9*.

4 **b.** Characterization of *cyp72a9-1* at the genomic level. This experiment was repeated two times with similar results.

5 **c.** qRT-PCR analysis of *CYP72A9* in the developing seeds/siliques of WT and the *cyp72a9-1* mutant. The values are  
6 presented as the means  $\pm$  SDs ( $n = 3$  biologically independent samples).

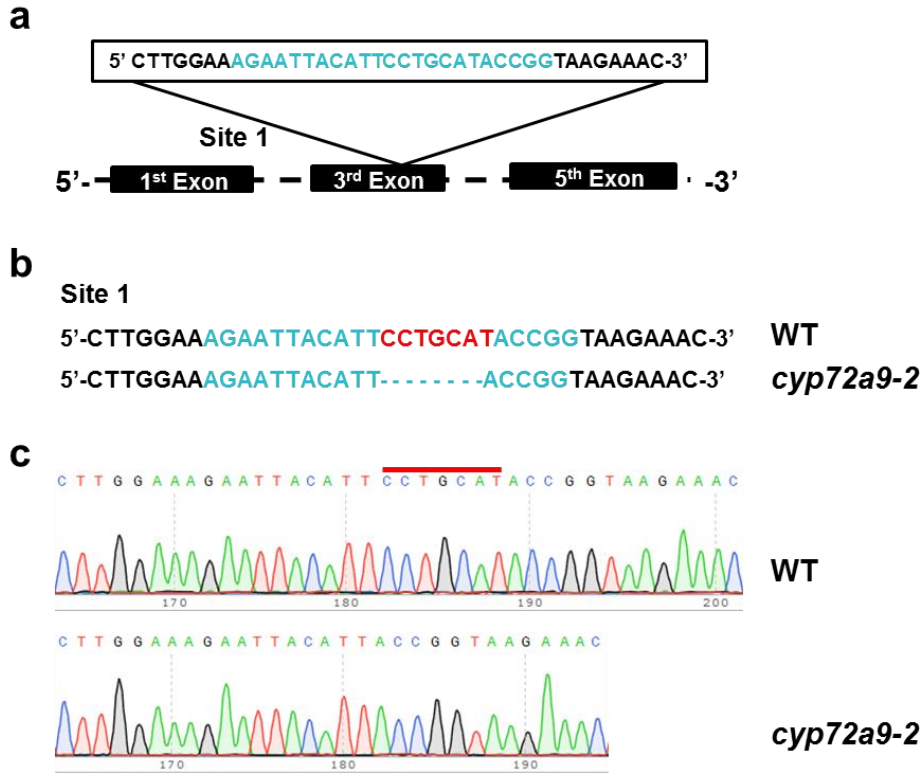

1

2 **Supplementary Fig. 7 *cyp72a9-2* mutant generated via CRISPR/Cas9.**

3 a. Schematic of the ssDNA template-mediated HDR (homology-directed repair) in *CYP72A9*. The target sequence is  
4 indicated in blue.

5 b. Representative sequences of WT and the *cyp72a9-2* mutant.

6 c. The DNA sequencing peaks showed evidence of successful gene editing in the target region of *CYP72A9*. Seven  
7 deleted base pairs are highlighted by a red line.



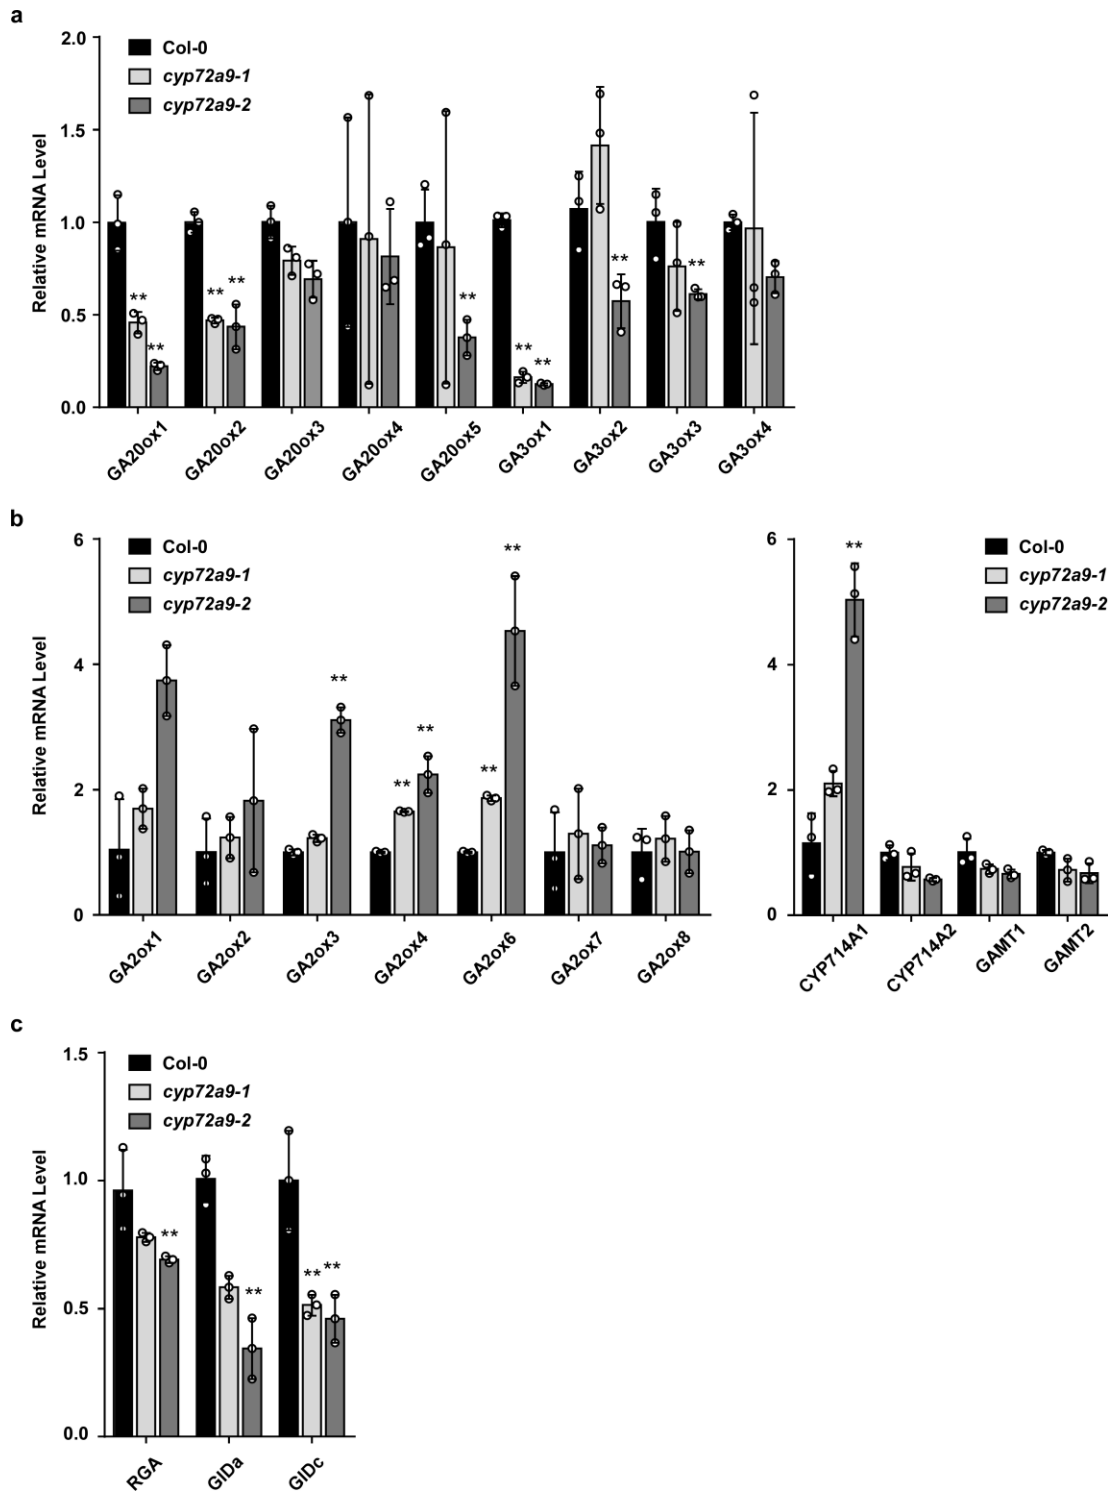

1

2 **Supplementary Fig. 8 Quantitative RT-PCR (qRT-PCR) analysis of GA metabolism and signaling genes in**

3 **the WT and *cyp72a9* mutants.** The plant samples (developing seeds/siliques) used herein were the same as those

4 used in Fig. 4d. *At1g13320*, *At4g26410*, and *At5g46630* were used as reference genes in this analysis. The values are

1 presented as the means  $\pm$  SDs ( $n = 3$  biologically independent samples). The transcript level of each tested gene in  
2 WT was set as 1.0. \*\*,  $P < 0.01$  (two-tailed Student's  $t$ -test), significantly different from wild-type (Col-0).

3 A. qRT-PCR analysis of GA biosynthesis genes (*GA20ox1*, *At4G25420*; *GA20ox2*, *At5G51810*; *GA20ox3*,  
4 *At5G07200*; *GA20ox4*, *At1G60980*; *GA3ox1*, *At1G15550*; *GA3ox2*, *At1G80340*; *GA3ox3*, *At4G21690*; *GA3ox4*,  
5 *At1G80330*) in WT and *cyp72a9* mutants.

6 B. qRT-PCR analysis of GA deactivation genes (*GA2ox1*, *At1G78440*; *GA2ox2*, *At1G30040*; *GA2ox3*, *At2G34555*;  
7 *GA2ox4*, *At1G47990*; *GA2ox6*, *At1G02400*; *GA2ox7*, *At1G50960*; *GA2ox8*, *At4G21200*; *CYP714A1*, *At5G24910*;  
8 *CYP714A2*, *At5G24900*; *GAMT1*, *At4G26420*; *GAMT2*, *At5G56300*) in WT and *cyp72a9* mutants.

9 C. qRT-PCR analysis of GA signaling genes (*RGA*, *At2G01570*; *GID1a*, *At3G05120*; *GID1c*, *At5G27320*) in WT  
10 and *cyp72a9* mutants.

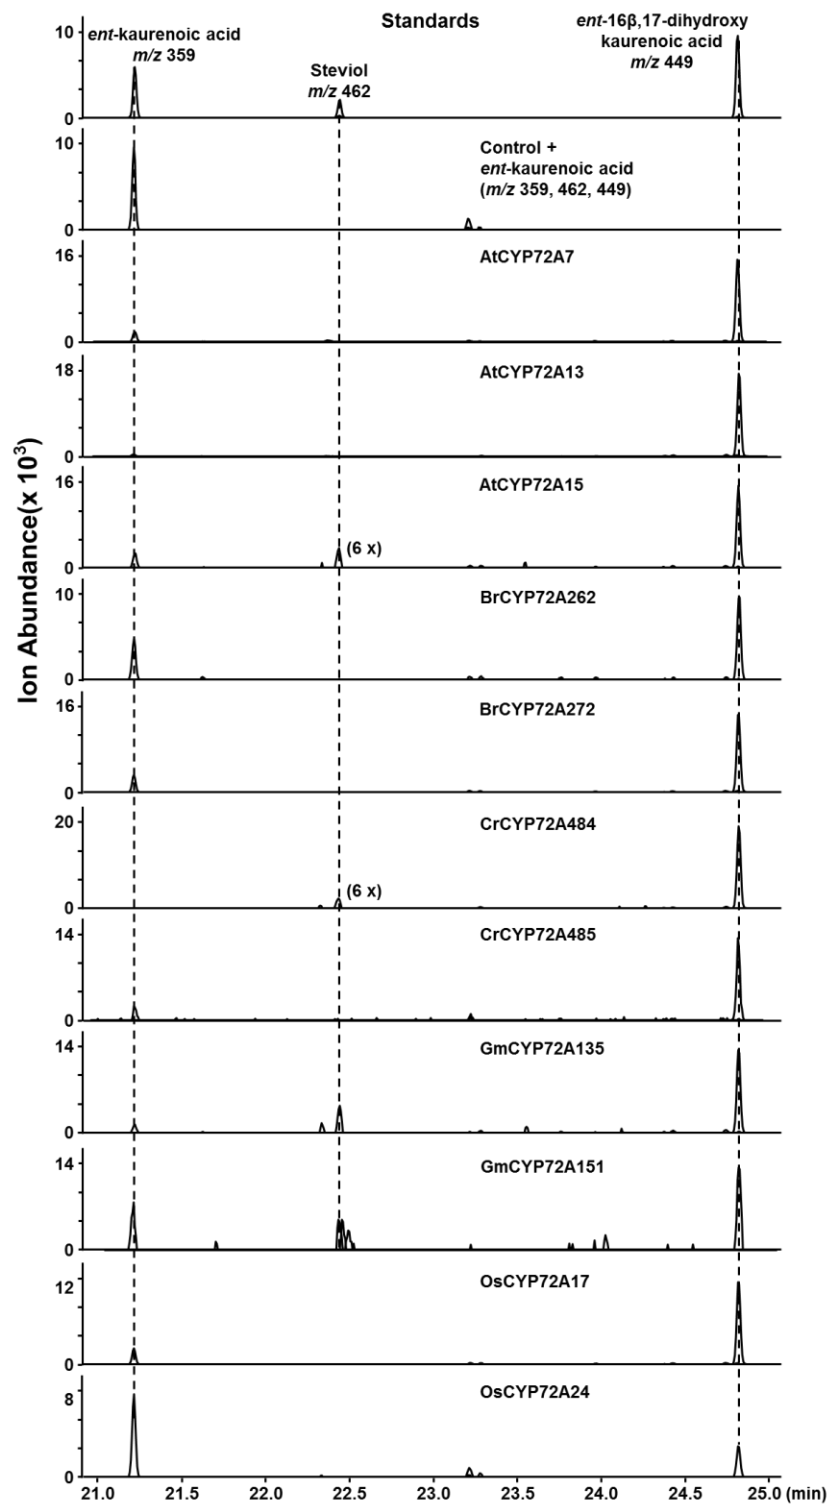

1

2 **Supplementary Fig. 9 Biochemical screening of CYP72As using *ent*-kaurenoic acid as substrate.**

3 Chromatogram of selected ions of *m/z* 359 for KA, *m/z* 462 for steviol, and *m/z* 449 for *ent*-16 $\beta$ ,17-dihydroxy KA. It

4 is noteworthy that the y axis scale for each reaction is arbitrary and provided for clarity, and the steviol peak has

1 been amplified by 6 times to allow easier visualization. Control, yeast strain harboring pESC-Leu empty vector. This  
2 experiment was repeated two times with similar results.

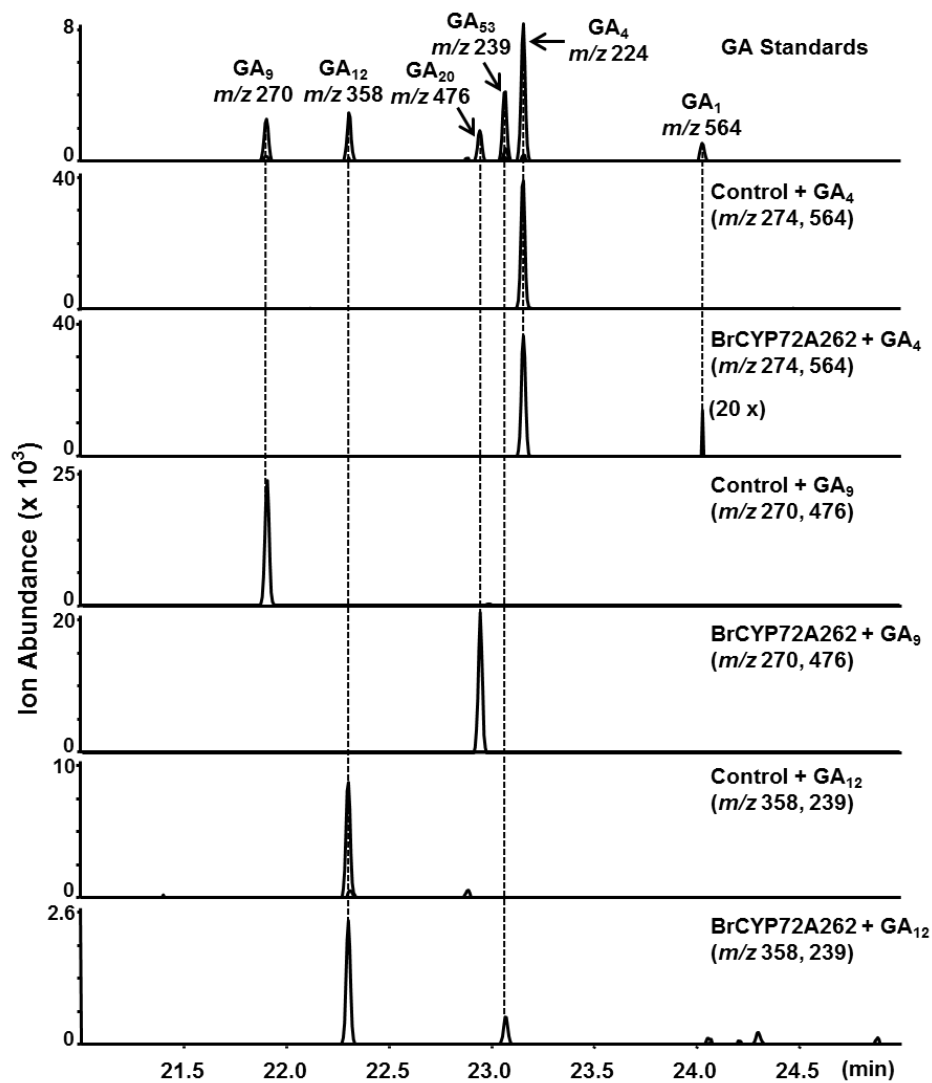

4 **Supplementary Fig. 10 Biochemical assays of CYP72A262 from *Brassica rapa*.** CYP72A262 converted GA<sub>4</sub>,  
5 GA<sub>9</sub>, and GA<sub>12</sub> into GA<sub>1</sub>, GA<sub>20</sub>, and GA<sub>53</sub>, as verified by comparison to authentic standards. Chromatogram of  
6 selected ions of *m/z* 546 for GA<sub>1</sub>, *m/z* 224 for GA<sub>4</sub>, *m/z* 270 for GA<sub>9</sub>, *m/z* 358 for GA<sub>12</sub>, *m/z* 476 for GA<sub>20</sub>, and *m/z*  
7 239 for GA<sub>53</sub>. It is noteworthy that the y axis scale for each reaction is arbitrary and provided for clarity and the GA<sub>4</sub>  
8 region has been amplified by 20 times to allow easier visualization. Control, yeast strain harboring pESC-Leu empty  
9 vector. This experiment was repeated two times with similar results.

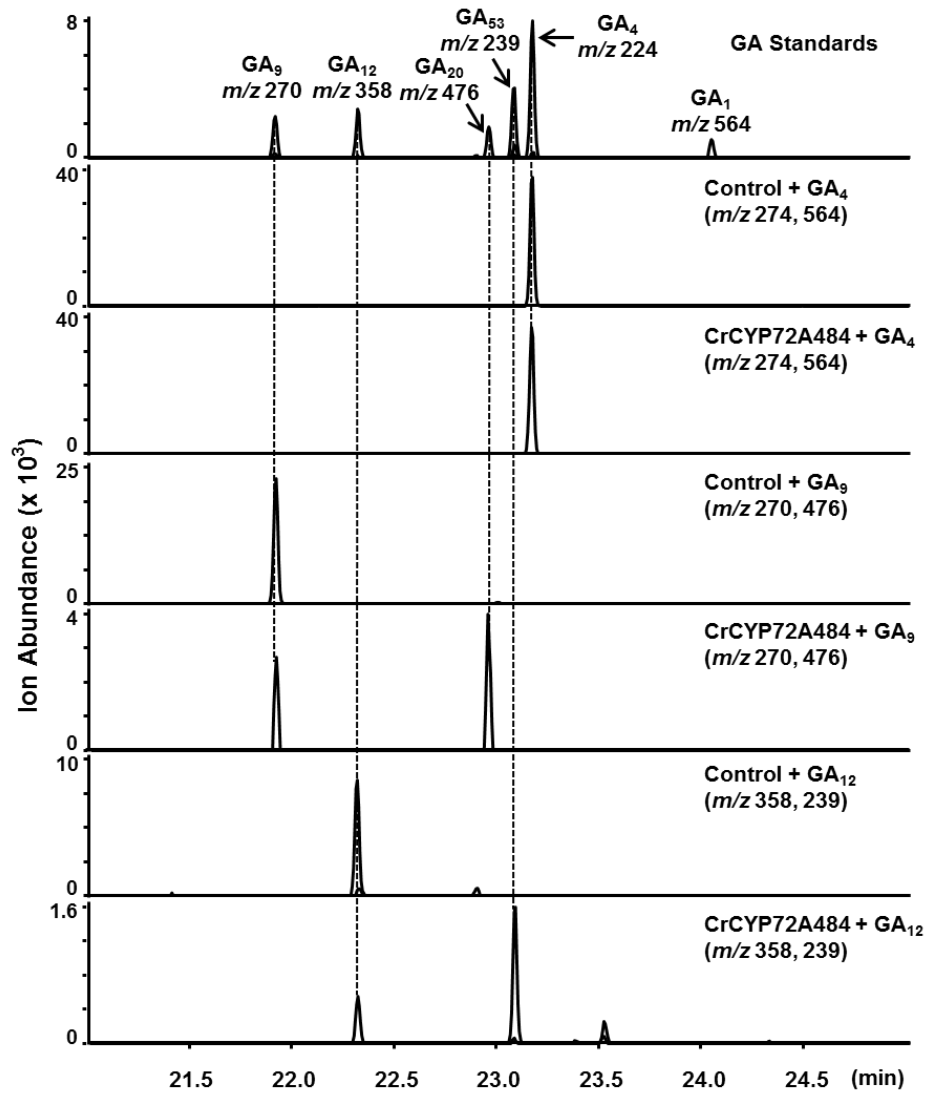

1

2 **Supplementary Fig. 11 Biochemical assays of CYP72A484 from *Capsella rubella*.** CYP72A484 converted GA<sub>9</sub>,  
 3 and GA<sub>12</sub> into GA<sub>20</sub>, and GA<sub>53</sub>, as verified by comparison to authentic standards. Chromatogram of selected ions of  
 4 *m/z* 546 for GA<sub>1</sub>, *m/z* 224 for GA<sub>4</sub>, *m/z* 270 for GA<sub>9</sub>, *m/z* 358 for GA<sub>12</sub>, *m/z* 476 for GA<sub>20</sub>, and *m/z* 239 for GA<sub>53</sub>. It is  
 5 noteworthy that the y axis scale for each reaction is arbitrary and provided for clarity. Control, yeast strain harboring  
 6 pESC-Leu empty vector. This experiment was repeated two times with similar results.

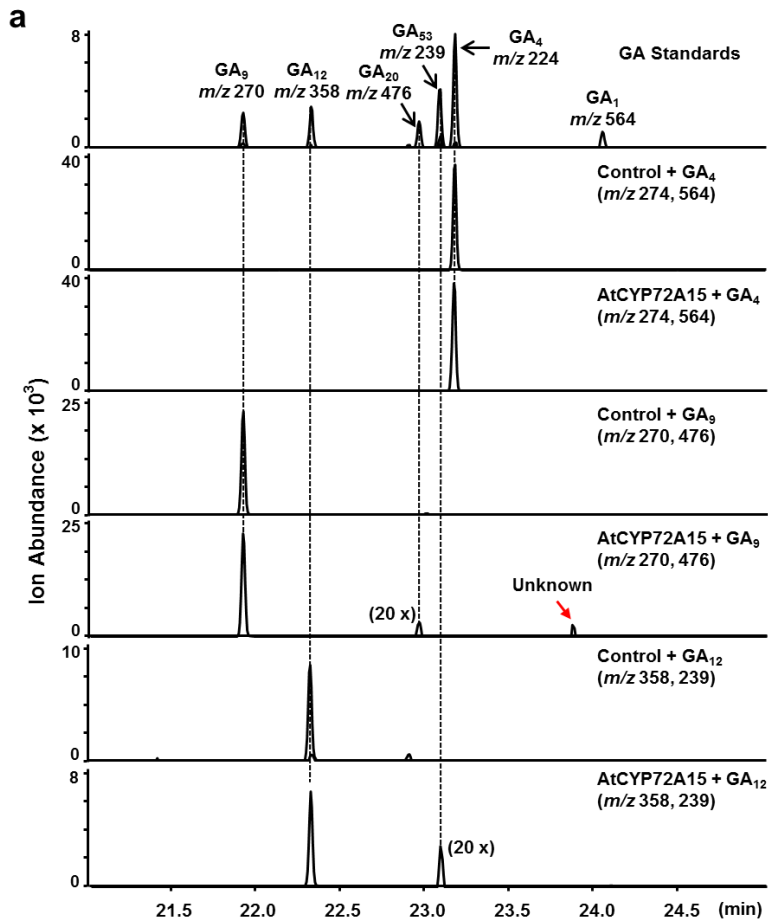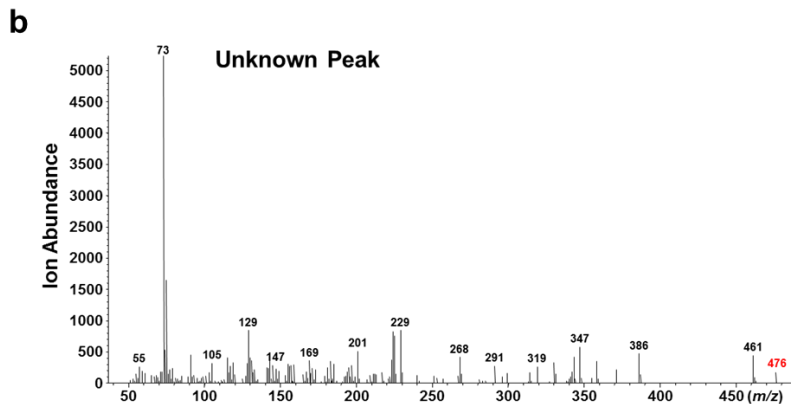

1

2 **Supplementary Fig. 12 Biochemical assays of CYP72A15 from *Arabidopsis thaliana*.**

3 **a.** CYP72A15 converted GA<sub>9</sub>, and GA<sub>12</sub> into GA<sub>20</sub> (and an unknown product) and GA<sub>53</sub>, as verified by comparison  
 4 to authentic standards. Chromatogram of selected ions of m/z 564 for GA<sub>1</sub>, m/z 224 for GA<sub>4</sub>, m/z 270 for GA<sub>9</sub>, m/z  
 5 358 for GA<sub>12</sub>, m/z 476 for GA<sub>20</sub>, and m/z 239 for GA<sub>53</sub>. It is noteworthy that the y axis scale for each reaction is  
 6 arbitrary and provided for clarity. Control, yeast strain harboring pESC-Leu empty vector. This experiment was  
 7 repeated two times with similar results.

1 b. The mass spectrum of the unknown product generated from GA<sub>9</sub> by CYP72A15.

2

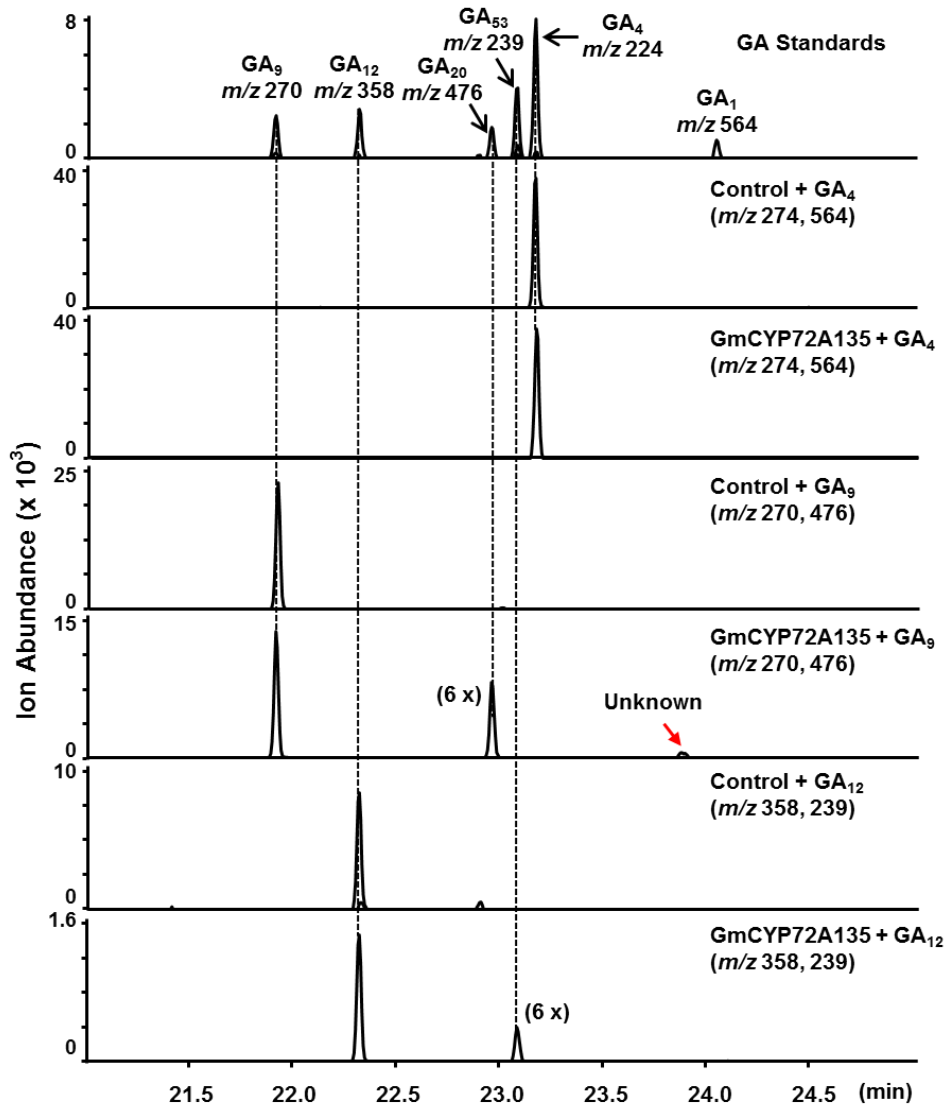

3

4 **Supplementary Fig. 13 Biochemical assays of CYP72A135 from *Glycine max*.** CYP72A135 converted GA<sub>9</sub>, and  
5 GA<sub>12</sub> into GA<sub>20</sub> (and an unknown product) and GA<sub>53</sub>, as verified by comparison to authentic standards.  
6 Chromatogram of selected ions of *m/z* 546 for GA<sub>1</sub>, *m/z* 224 for GA<sub>4</sub>, *m/z* 270 for GA<sub>9</sub>, *m/z* 358 for GA<sub>12</sub>, *m/z* 476  
7 for GA<sub>20</sub>, and *m/z* 239 for GA<sub>53</sub>. It is noteworthy that the y axis scale for each reaction is arbitrary and provided for  
8 clarity. Control, yeast strain harboring pESC-Leu empty vector. The unknown product (marked by a red arrow) was  
9 the same as that shown in Supplementary Fig.12. This experiment was repeated two times with similar results.

10

11

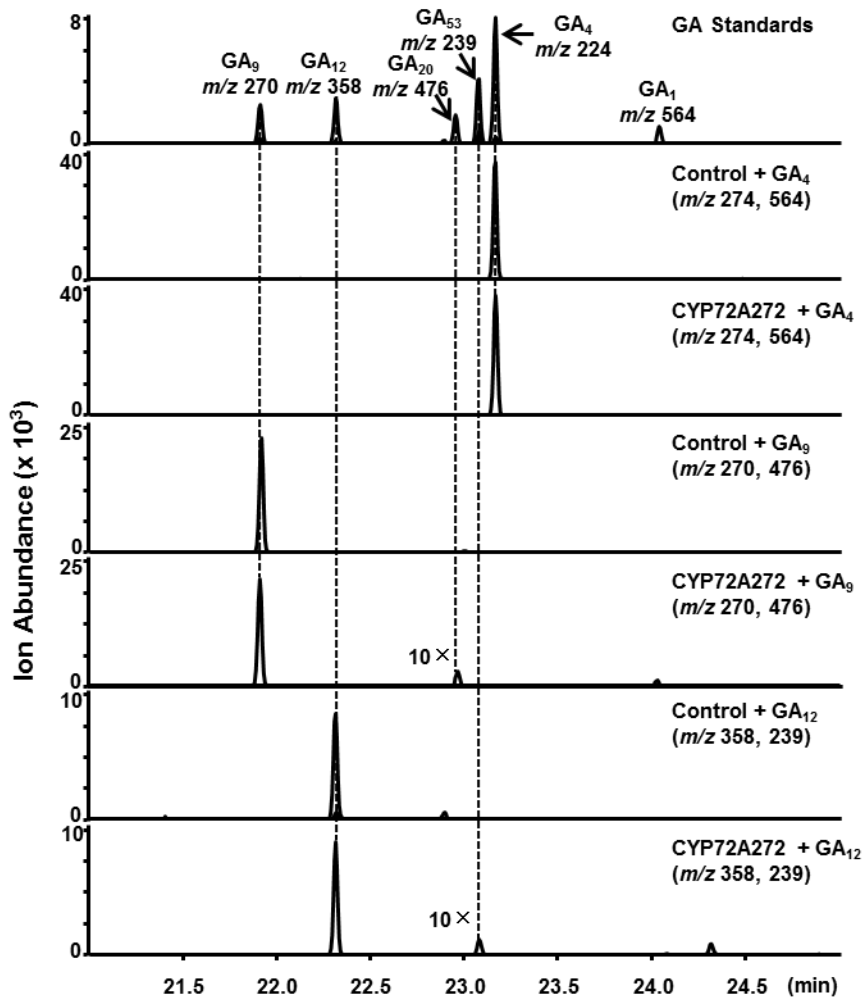

1

2 **Supplementary Fig. 14 Biochemical assays of CYP72A272 from *Brassica rapa*.** CYP72A272 converted GA<sub>9</sub>,  
 3 and GA<sub>12</sub> into GA<sub>20</sub> and GA<sub>53</sub>, as verified by comparison to authentic standards. Chromatogram of selected ions of  
 4 m/z 564 for GA<sub>1</sub>, m/z 224 for GA<sub>4</sub>, m/z 270 for GA<sub>9</sub>, m/z 358 for GA<sub>12</sub>, m/z 476 for GA<sub>20</sub>, and m/z 239 for GA<sub>53</sub>. It is  
 5 noteworthy that the y axis scale for each reaction is arbitrary and provided for clarity. Control, yeast strain harboring  
 6 pESC-Leu empty vector. This experiment was repeated two times with similar results.



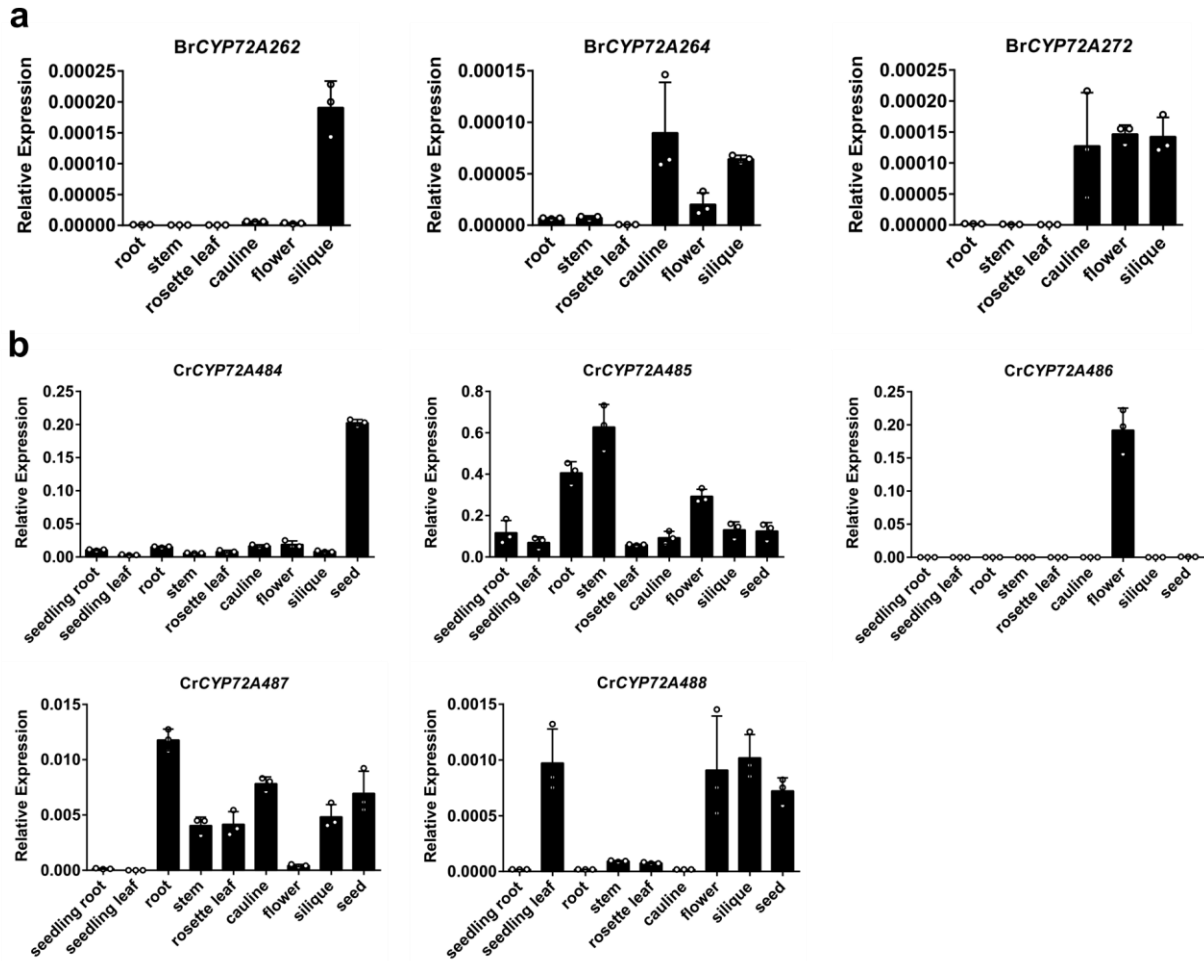

1

2 **Supplementary Fig. 15 Tissue-specificity of CYP72A genes in *Brassica rapa* (a) and *Capsella rubella* (b).** The

3 values are presented as the means  $\pm$  SDs ( $n = 3$  biologically independent samples).

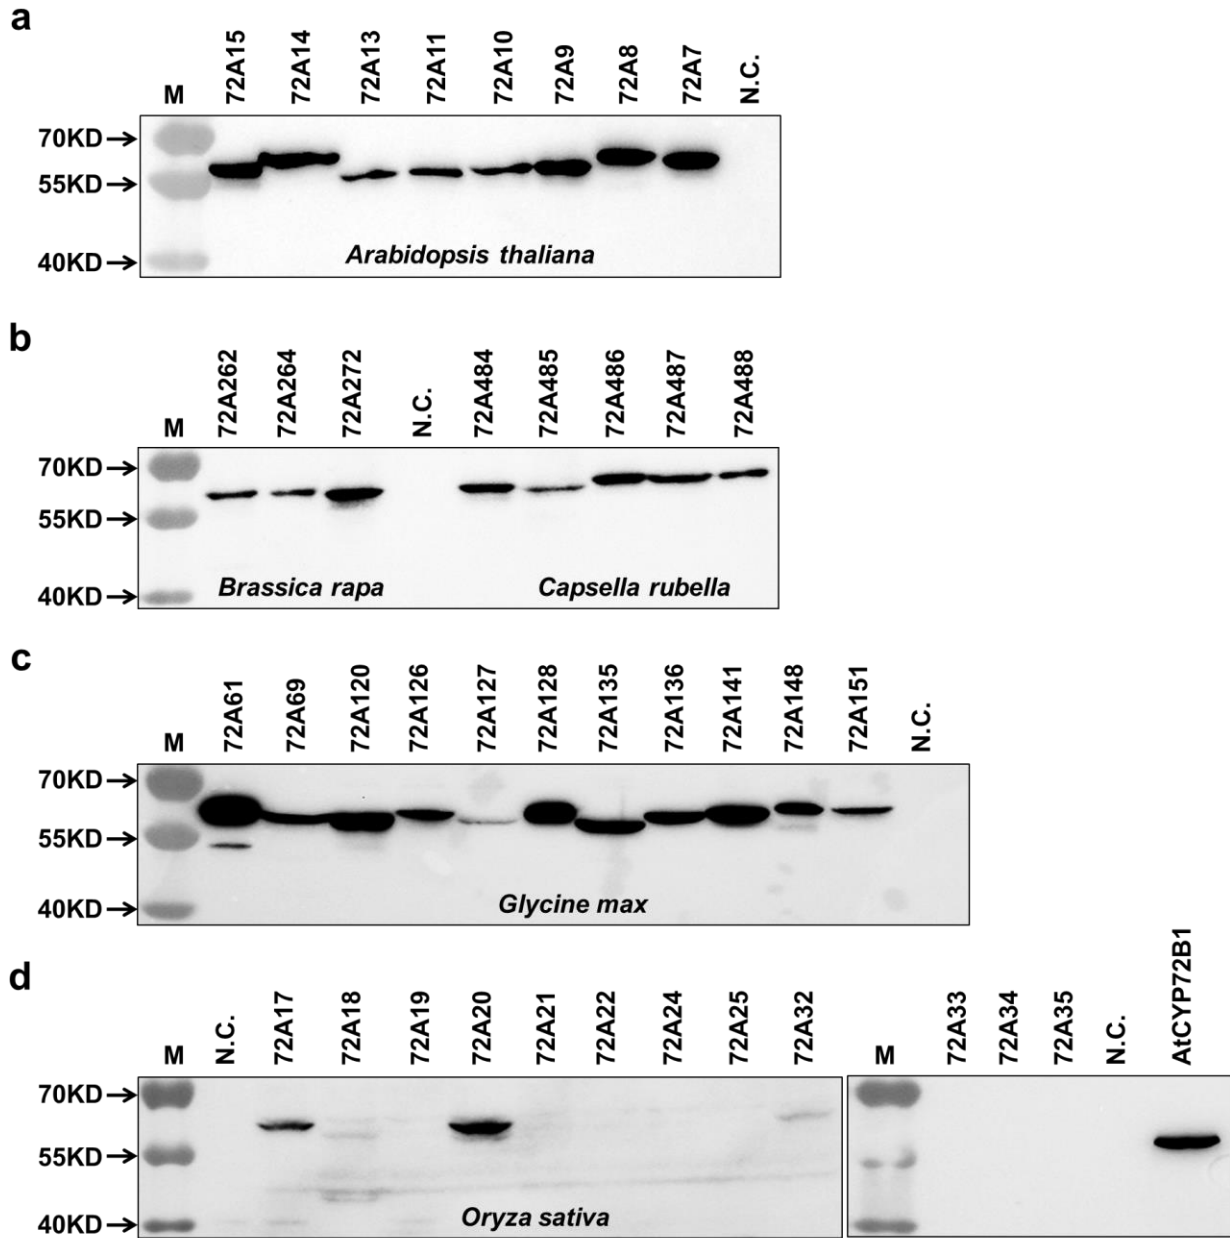

1  
2 **Supplementary Fig. 16** Detection of C-terminal Myc-tagged P450 protein in the WAT11 yeast strain with  
3 anti-Myc monoclonal antibody. This experiment was repeated at least two times with similar results. **a.**  
4 CYP72As from *Arabidopsis thaliana*; **b.** CYP72As from *Brassica rapa* and *Capsella rubella*; **c.** CYP72As from  
5 *Glycine max*; **d.** CYP72As from *Oryza sativa*. AtCYP72B1 was included in this assay. Twenty  $\mu$ g of microsomal  
6 protein was loaded in each lane. The calculated molecular weight of each Myc-tagged P450 is listed below:  
7 AtCYP72A7 (59.5KD), AtCYP72A8 (59.8KD), AtCYP72A9 (59.6KD), AtCYP72A10 (59.7KD), AtCYP72A11  
8 (59.3KD), AtCYP72A13 (59.7KD), AtCYP72A14 (59.7KD), AtCYP72A15 (59.6KD), AtCYP72B1 (60.5KD),  
9 BrCYP72A262 (59.4KD), BrCYP72A264 (59.4KD) BrCYP72A272 (59.2KD), CrCYP72A484 (59.3KD),  
10 CrCYP72A485 (59.4KD), CrCYP72A486 (59.8KD), CrCYP72A487 (59.9KD), CrCYP72A488 (59.8KD),

1 GmCYP72A61 (62.0KD), GmCYP72A69 (59.8KD), GmCYP72A120 (61.1KD), GmCYP72A126 (61.0KD),  
2 GmCYP72A127 (61.3KD), GmCYP72A128 (58.8KD), GmCYP72A135 (60.7KD), GmCYP72A136 (61.0KD),  
3 GmCYP72A141 (60.9KD), GmCYP72A148 (61.1KD), GmCYP72A151 (62.7KD), OsCYP72A17 (63.1KD),  
4 OsCYP72A18 (61.1KD), OsCYP72A19 (44.6KD), OsCYP72A20 (61.4KD), OsCYP72A21 (61.4KD),  
5 OsCYP72A22 (54.4KD), OsCYP72A24 (60.7KD), OsCYP72A25 (60.5KD), OsCYP72A32 (62.6KD),  
6 OsCYP72A33 (64.2KD), OsCYP72A34 (60.5KD), OsCYP72A35 (60.3KD). N.C., negative control, the microsome  
7 protein prepared from WAT11 yeast strain harboring pESC-Leu empty vector was loaded. M, protein marker.

8

1 **Supplementary Table 1. Primers used in this study.**

| Primer name                                                                        | Sequence (5' to 3')                  |
|------------------------------------------------------------------------------------|--------------------------------------|
| <b>For CYP72A Gene Cloning from Brassicaceae Plants (into pENTR/D-TOPO vector)</b> |                                      |
| AtCYP72A7-F                                                                        | CACCATGTCTTTTCAGTAGTAGCAGCTTTACCG    |
| AtCYP72A7-R                                                                        | TCAGAGCTTGTGCAGAATTAGATGAGCTC        |
| AtCYP72A8-F                                                                        | CACCATGAGTGATACAAAGATATCAGCAGTAGCAG  |
| AtCYP72A8-R                                                                        | TCAGAGCATGTGGAAGATCAACGGAGCAC        |
| AtCYP72A9-F                                                                        | CACCATGGAGATAGTAATTGCATCATTGGCTTTAG  |
| AtCYP72A9-R                                                                        | TCAAAGCTTGTGCAGGATAAGATGAGCCC        |
| AtCYP72A10-F                                                                       | CACCATGGAGATATCAGTTGCATGCGTAACAGTTTC |
| AtCYP72A10-R                                                                       | TTATAGCTTGCAGCAGAATAAGATGTGCAC       |
| AtCYP72A11-F                                                                       | CACCATGGAGATATCAGTTGCATCGGTAACAG     |
| AtCYP72A11-R                                                                       | TTAGAGCTTGTGCATGATAAGAGGAGC          |
| AtCYP72A13-F                                                                       | CACCATGGAGATATCAGTTGCATCGGTAACAG     |
| AtCYP72A13-R                                                                       | TTAGAGCTTGTGCAAGATAAGAGGAGC          |
| AtCYP72A14-F                                                                       | CACCATGGAGATATCAGTTTCTTCGGTAACATTTTC |
| AtCYP72A14-R                                                                       | TTAGAGCTTGTGCAGCATAAGATGAGC          |
| AtCYP72A15-F                                                                       | CACCATGGAGATATCGGTTGCATCGGTAAC       |
| AtCYP72A15-R                                                                       | TTAGAGCTTGTGCATGATAAGCTGAGC          |
| BrCYP72A262-F                                                                      | CACCATGGAGACATTACTTACATCATTGGC       |
| BrCYP72A262-R                                                                      | TCATAGCTTGTTTAGGATAAGATGAGCAC        |
| BrCYP72A264-F                                                                      | CACCATGGAGATATCAGTTGCGTTAGTAACAG     |
| BrCYP72A264-R                                                                      | TTATATCTTGTTAAGGATAAGATGAGCACCG      |
| BrCYP72A272-F                                                                      | CACCATGGACGTAGTTGCTTCAGTAACAATTTTC   |
| BrCYP72A272-R                                                                      | TTATAGTTTGTGTAGGATAAGATGAGCAC        |
| CrCYP72A484-F                                                                      | CACCATGGAGATATCAGTTGCGTCGGTAAC       |
| CrCYP72A484-R                                                                      | TTAGAGCTTGTGCAAGATAAGAGGAGC          |
| CrCYP72A485-F                                                                      | CACCATGTATCCTGAAAATAGTCGCAGTTAC      |
| CrCYP72A485-R                                                                      | CTAGAGCTTGTGCAAGATAAGAGGAG           |
| CrCYP72A486-F                                                                      | CACCATGGAGATATCAGTAGCGTCGGTAGCAT     |
| CrCYP72A486-R                                                                      | TCATAGCTTCTTAAGGATAACAGGTGCACC       |
| CrCYP72A487-F                                                                      | CACCATGGAGATGTCTGTTTATACTATTCAAT     |
| CrCYP72A487-R                                                                      | TTAGAGCGTGTGCAAGATAAGATGAG           |
| CrCYP72A488-F                                                                      | CACCATGAGTGATACAGAGATGTCAGCGGTAGC    |
| CrCYP72A488-R                                                                      | TCAGAGCATGTGGAAGATCAACGGAGCAC        |
| <b>For CYP72A Gene Cloning from Soybean</b>                                        |                                      |
| GmCYP72A61-F                                                                       | ATGCTTATGTCTGGCACAGAACAGGTG          |
| GmCYP72A61-R                                                                       | CTAGAGTTTGCGTAAAATGAGATGAGCC         |
| GmCYP72A69-F                                                                       | ATGGAAGCAGCATGGGTCAATATTCT           |
| GmCYP72A69-R                                                                       | TTATTCATATTTCTCCACCTTATGTAGAATGACTG  |
| GmCYP72A120-F                                                                      | ATGGGGTTCACTCCCACAAGTAC              |
| GmCYP72A120-R                                                                      | CTACAACCTTATGTAAGATGATATGAGCACC      |
| GmCYP72A126-F                                                                      | ATGGAAGCAGCGTGGATCACAATTC            |
| GmCYP72A126-R                                                                      | TTATATTTCCACCTTTCTTAGAATGAGATGAGCAC  |
| GmCYP72A127-F                                                                      | ATGGAAGCACCATGGGCCACA                |
| GmCYP72A127-R                                                                      | TTACATTTCAACTTTACGTAAAATGACATGA      |
| GmCYP72A128-F                                                                      | ATGGAAGAAGCATCATGTGTATGCTTAGT        |
| GmCYP72A128-R                                                                      | TTATATTTCAACTTTACGTAAAATGACATGAGCACC |
| GmCYP72A135-F                                                                      | ATGGAAGCAGCATGGGCCACA                |
| GmCYP72A135-R                                                                      | TCATATTGTGACTTTACGTAGAATGATATG       |
| GmCYP72A136-F                                                                      | ATGGAAGCAGCATCGGCCA                  |
| GmCYP72A136-R                                                                      | TCATATTGGCACTTTACGTAGAATGAT          |
| GmCYP72A141-F                                                                      | ATGGAGCCATTATTTCTTCAGCAGC            |

|                                                                               |                                          |
|-------------------------------------------------------------------------------|------------------------------------------|
| GmCYP72A141-R                                                                 | TCATAGTTTATGCAAAACGATGTGTGCC             |
| GmCYP72A142-F                                                                 | ATGAACGAATGGAAGATGTTAGTATCCAAA           |
| GmCYP72A142-R                                                                 | CTATAATTTATGGAATATAATAGGCGTGCCAAATTGA    |
| GmCYP72A148-F                                                                 | ATGGGGCTACCACCCACTATTG                   |
| GmCYP72A148-R                                                                 | CTACAGCTTGTGTAATAATGATATGAGCC            |
| GmCYP72A151-F                                                                 | ATGAAGTATCTTCTTCTCTCTTTGTTTCATGGTT       |
| GmCYP72A151-R                                                                 | TCATATTTCCACCTTATGTAGAATGAGATGAGCA       |
| <b>For CYP72As Gene Cloning from Rice</b>                                     |                                          |
| OsCYP72A17.1-F                                                                | ATGCAGAGAGAAAAAGAAGCAATGGGCA             |
| OsCYP72A17.1-R                                                                | TCAGAGTCGGCGCAGCCTAACCGGAACGCC           |
| OsCYP72A17.2-F                                                                | ATGGGCATCGGCATCGGCATCGGCATC              |
| OsCYP72A17.2-R                                                                | TCAGAGTCGGCGCAGCCTAACCGGAACGCC           |
| OsCYP72A18-F                                                                  | ATGCTGATGATGCTAGGGGCGGCCTCC              |
| OsCYP72A18-R                                                                  | TTAGATTTTCTTCAGCTTAATTTGTGCAC            |
| OsCYP72A19-F                                                                  | ATGGATCCGACCTCGGTGCCAT                   |
| OsCYP72A19-R                                                                  | TCACGTTTTGAGTTTGCTCAGGCCTTCATAATC        |
| OsCYP72A20-F                                                                  | ATGGAGGAGGCCACGGGAATG                    |
| OsCYP72A20-R                                                                  | TCATAGTCTTGTGAGTATAATTTGTGCACCATG        |
| OsCYP72A21-F                                                                  | ATGGTTCTTGGAGCCTGGTTGAT                  |
| OsCYP72A21-R                                                                  | TCATATAGCTCTAAGCTTAATCTGCGCACC           |
| OsCYP72A22-F                                                                  | ATGGTTCTTGGAGCCGGGTT                     |
| OsCYP72A22-R                                                                  | TCATATAGCTCTAAGCTTAATCTGTGCACCATG        |
| OsCYP72A23-F                                                                  | ATGCCGGATTACAAAGTTCCTGGAATTG             |
| OsCYP72A23-R                                                                  | TTAGATCATCCTAAGCTTCATCTGCGCGC            |
| OsCYP72A24-F                                                                  | ATGGGGATGGTCGTCTTCGC                     |
| OsCYP72A24-R                                                                  | TCAGTTTAGCCTCGTGAGCCTGACCTG              |
| OsCYP72A25-F                                                                  | ATGGAGATTGTCGATGGCGCTTC                  |
| OsCYP72A25-R                                                                  | TCAGAGTTTAGTAAGCTTAATCTGTGCC             |
| OsCYP72A32-F                                                                  | ATGGTTCTTGGAGGGTGGCTG                    |
| OsCYP72A32-R                                                                  | TCATATAGCTCTAATTTTAATCTGTGCACCGTGC       |
| OsCYP72A33-F                                                                  | ATGTGGGCTCCGGCCTCATC                     |
| OsCYP72A33-R                                                                  | CTAATAAAACACACTATAATCTGAAATGGTCATATAGCTC |
| OsCYP72A34-F                                                                  | ATGCTGATCATGCTGGGGCT                     |
| OsCYP72A34-R                                                                  | TCAAATTCTCTTCAGCTTAATTTGGGCACC           |
| OsCYP72A35-F                                                                  | ATGCTGGGAGAGGCCCGC                       |
| OsCYP72A35-R                                                                  | TAGAGCTTCTTCAATTTAATTGGAGAACC            |
| <b>For Enzymatic Activity Screening in WAT11 Yeast (into pESC-Leu vector)</b> |                                          |
| AtCYP72A7-ApaI-F                                                              | CGGGGGCCCATGTCTTTTTTCAGTAGTAGCAGCTTTAC   |
| AtCYP72A7-SalI-R                                                              | ACGCGTCGACGAGCTTGTGCAGAATTAGATGAG        |
| AtCYP72A8-ApaI-F                                                              | CGGGGGCCCATGAGTGATACAAAGATATCAGCAGTAGC   |
| AtCYP72A8-SalI-R                                                              | ACGCGTCGACGAGCATGTGGAAGATCAACGGAG        |
| AtCYP72A9-ApaI-F                                                              | CGGGGGCCCATGGAGATAGTAATTGCATCATTGGCTTTAG |
| AtCYP72A9-SalI-R                                                              | ACGCGTCGACAAGCTTGTGCAGGATAAGATGAGC       |
| AtCYP72A10-ApaI-F                                                             | CGGGGGCCCAGTGGAGATATCAGTTGCATGCGTAACAG   |
| AtCYP72A10-SalI-R                                                             | ACGCGTCGACCTTGCAGCAGAATAAGATGTG          |
| AtCYP72A11-ApaI-F                                                             | CGGGGGCCCATGGAGATATCAGTTGCATCGGTAAC      |
| AtCYP72A11-SalI-R                                                             | ACGCGTCGACGAGCTTGTGCATGATAAGAGGAGC       |
| AtCYP72A13-ApaI-F                                                             | CGGGGGCCCAGTGGAGATATCAGTTGCATCGGTAACAG   |
| AtCYP72A13-SalI-R                                                             | ACGCGTCGACGAGCTTGTGCAAGATAAGAGGAGC       |
| AtCYP72A14-ApaI-F                                                             | CGGGGGCCCAGTGGAGATATCAGTTTCTTCGGTAAC     |
| AtCYP72A14-SalI-R                                                             | ACGCGTCGACGAGCTTGTGCAGCATAAGATGAGC       |
| AtCYP72A15-ApaI-F                                                             | CGGGGGCCCAGTGGAGATATCGGTTGCATCGG         |
| AtCYP72A15-SalI-R                                                             | ACGCGTCGACGAGCTTGTGCATGATAAGCTGAG        |

|                    |                                            |
|--------------------|--------------------------------------------|
| BrCYP72A262-ApaI-F | CGGGGGCCCATGGAGACATTACTTACATCATTG          |
| BrCYP72A262-SalI-R | ACGCGTCGACCTTGTTTAGGATAAGATG               |
| BrCYP72A264-ApaI-F | CGGGGGCCCATGGAGATATCAGTTGCGTTAGTAAC        |
| BrCYP72A264-SalI-R | ACGCGTCGACTATCTTGTAAAGGATAAGATGAGC         |
| BrCYP72A272-ApaI-F | CGGGGGCCCATGGACGTAGTTGCTTCAGTAACAAT        |
| BrCYP72A272-SalI-R | ACGCGTCGACTTTGTGTAGGATAAGATGAG             |
| CrCYP72A484-ApaI-F | CGGGGGCCCATGGAGATATCAGTTGCGTCGGTAAC        |
| CrCYP72A484-ApaI-R | CGGGGGCCCCCGAGCTTGTGCAAGATAAGAGGAG         |
| CrCYP72A485-ApaI-F | CGGGGGCCCATGTATCCTGAAAATAGTCGCAG           |
| CrCYP72A485-SalI-R | ACGCGTCGACGAGCTTGTGCAAGATAAGAG             |
| CrCYP72A486-ApaI-F | CGGGGGCCCATGGAGATATCAGTAGCGTCGGTAG         |
| CrCYP72A486-SalI-R | ACGCGTCGACCTTCTTAAGGATAACAGGTGC            |
| CrCYP72A487-ApaI-F | CGGGGGCCCATGGAGATGTCTGTTTTATACTATTC        |
| CrCYP72A487-SalI-R | ACGCGTCGACGAGCGTGTGCAAGATAAGATGAG          |
| CrCYP72A488-ApaI-F | CGGGGGCCCATGAGTGATACAGAGATGTCAGCGGTA       |
| CrCYP72A488-SalI-R | ACGCGTCGACGAGCATGTGGAAGATCAACGGAG          |
| OsCYP72A17-SalI-F  | ACGCGTCGACATGCAGAGAGAAAAAGAAGCAATGGGC      |
| OsCYP72A17-SalI-R  | ACGCGTCGACGAGTCGGCGCAGCCTAACCG             |
| OsCYP72A18-ApaI-F  | CGGGGGCCCATGCTGATGATGCTAGGGGCGGCC          |
| OsCYP72A18-ApaI-R  | CGGGGGCCCCCGATTTTCTTCAGCTTAATTTGTG         |
| OsCYP72A19-ApaI-F  | CGGGGGCCCATGGATCCGACCTCGGTGCCATG           |
| OsCYP72A19-SalI-R  | ACGCGTCGACCGTTTTGAGTTTGCTCAGGCCTTCATAATC   |
| OsCYP72A20-SalI-F  | ACGCGTCGACATGGAGGAGGCCACGGGAATG            |
| OsCYP72A20-SalI-R  | ACGCGTCGACTCTTGTGAGTATAATTTGTGCACCATG      |
| OsCYP72A21-ApaI-F  | CGGGGGCCCATGGTTCTTGGAGCCTGGTTGATG          |
| OsCYP72A21-SalI-R  | ACGCGTCGACTATAGCTCTAAGCTTAATCTGCGCACC      |
| OsCYP72A22-SalI-F  | ACGCGTCGACATGGTTCTTGGAGCCGGGTTG            |
| OsCYP72A22-SalI-R  | ACGCGTCGACTATAGCTCTAAGCTTAATCTGTGCACCATG   |
| OsCYP72A24-ApaI-F  | CGGGGGCCCATGGGGATGGTCTGCTTCGCCG            |
| OsCYP72A24-SalI-R  | ACGCGTCGACGTTTAGCCTCGTGAGCCTGACCTG         |
| OsCYP72A25-ApaI-F  | CGGGGGCCCATGGAGATTGTCGATGGCGCTTC           |
| OsCYP72A25-SalI-R  | ACGCGTCGACGAGTTTAGTAAGCTTAATCTGTGCC        |
| OsCYP72A32-ApaI-F  | CGGGGGCCCATGGTTCTTGGAGGGTGGCTGT            |
| OsCYP72A32-SalI-R  | ACGCGTCGACTATAGCTCTAATTTAATCTGTGCACCGTGC   |
| OsCYP72A33-ApaI-F  | CGGGGGCCCATGTGGGCTCCGGCCTCATC              |
| OsCYP72A33-SalI-R  | ACGCGTCGACATAAAACACACTATAATCTGAAATGGTCATAT |
| OsCYP72A34-ApaI-F  | CGGGGGCCCATGCTGATCATGCTGGGGCTGG            |
| OsCYP72A34-SalI-R  | ACGCGTCGACAATTCTCTTCAGCTTAATTTGGGCACCG     |
| OsCYP72A35-SalI-F  | ACGCGTCGACATGCTGGGAGAGGCCGCC               |
| OsCYP72A35-SalI-R  | ACGCGTCGACGAGCTTCTTCAATTTAATTTGGAGAACCG    |
| GmCYP72A61-ApaI-F  | CGGGGGCCCATGCTTATGTCTGGCACAGAACAGGTG       |
| GmCYP72A61-SalI-R  | ACGCGTCGACCTAGAGTTTTCGTAATAAGATGAGCC       |
| GmCYP72A69-SalI-F  | ACGCGTCGACATGGAAGCAGCATGGGTCAATATTCT       |
| GmCYP72A69-SalI-R  | ACGCGTCGACTTCATATTTCTCCACCTTATGTAGAATGACTG |
| GmCYP72A120-ApaI-F | CGGGGGCCCATGGGGTTCACTCCCACAAGTAC           |
| GmCYP72A120-SalI-R | ACGCGTCGACCTACAACCTTATGTAAGATGATATGAGCACC  |
| GmCYP72A126-ApaI-F | CGGGGGCCCATGGAAGCAGCGTGGATCACAAATTC        |
| GmCYP72A126-SalI-R | ACGCGTCGACTATTTCCACCTTTCTTAGAATGAGATGAG    |
| GmCYP72A127-ApaI-F | CGGGGGCCCATGGAAGCACCATGGGCCACA             |
| GmCYP72A127-SalI-R | ACGCGTCGACCATTTCAACCTTTACGTAAAATGACATGA    |
| GmCYP72A128-ApaI-F | CGGGGGCCCATGGAAGAAGCATCATGTGTATGCTTAGT     |
| GmCYP72A128-SalI-R | ACGCGTCGACTATTTCAACCTTTACGTAAAATGACATGAG   |
| GmCYP72A135-ApaI-F | CGGGGGCCCATGGAAGCAGCATGGGCCACA             |

|                                                           |                                            |
|-----------------------------------------------------------|--------------------------------------------|
| GmCYP72A135-SalI-R                                        | ACGCGTCGACTCATATTGTGACTTTACGTAGAATGATATG   |
| GmCYP72A136-ApaI-F                                        | CGGGGGCCCATGGAAGCAGCATCGGCCA               |
| GmCYP72A136-SalI-R                                        | ACGCGTCGACTCATATTGGCACTTTACGTAGAATGAT      |
| GmCYP72A141-ApaI-F                                        | CGGGGGCCCATGGAGCCATTATTTTCTTCAGCAGC        |
| GmCYP72A141-SalI-R                                        | ACGCGTCGACTCATAGTTTATGCAAACGATGTGTGCC      |
| GmCYP72A148-ApaI-F                                        | CGGGGGCCCATGGGGCTACCACCCACTATTG            |
| GmCYP72A148-SalI-R                                        | ACGCGTCGACCTACAGCTTGTGTAAAATGATATGAGCC     |
| GmCYP72A151-ApaI-F                                        | CGGGGGCCCATGAAGTATCTTCTTCTCTTTGTTTCATGGT   |
| GmCYP72A151-SalI-R                                        | ACGCGTCGACTCATATTTCCACCTTATGTAGAATGAGATGAG |
| AtCYP72B1-ApaI-F                                          | CGGGGGCCCATGGAGGAAGAAAGTAGCAGCTGGTTC       |
| AtCYP72B1-SalI-R                                          | ACGCGTCGACATCCTCATGATTGGTCAATCTCCGGA       |
| <b>For Subcellular Localization (pJIT163-hGFP vector)</b> |                                            |
| CYP72A9-SalI-F                                            | GCGTCGACATGGAGATAGTAATTGCATCATTG           |
| CYP72A9-BamHI-R                                           | CGGGATCCAAGCTTGTGCAGGATAAGATGAGCC          |
| <b>For Promoter::GUS (pMD162 vector)</b>                  |                                            |
| At3g14630-promoter-F                                      | CACCTGCATGTGTTTCTCTTAGAATAAGATGGATTTC      |
| At3g14630-promoter -R                                     | TTGCTGATGTTTTTGGTCTCTTAAAATTTTTGAG         |
| <b>For qRT-PCR Analysis</b>                               |                                            |
| Actin2-RT-F                                               | AGTCTTGTTCCAGCCCTCGTTTGTG                  |
| Actin2-RT-R                                               | TCCTGGACCTGCCTCATCATACTCG                  |
| AtCYP72A7-RT-F                                            | TCCCTGCGTTCTACCATTGT                       |
| AtCYP72A7-RT-R                                            | AAACGGGAGAAAGCGAGAGA                       |
| AtCYP72A8-RT-F                                            | ACGGTATGGATATGGAAAGGTCTG                   |
| AtCYP72A8-RT-R                                            | CTTTGATGTGTTCTGGTTTCGTC                    |
| AtCYP72A9-RT-F                                            | AACAATAATGAATCCACAGCTG                     |
| AtCYP72A9-RT-R                                            | ACGACCCTTATCTGAAACTAA                      |
| AtCYP72A10-RT-F                                           | GAGCTAATCAAAGAAGTGTTC AACAAAG              |
| AtCYP72A10-RT-R                                           | TTGTAAGATGAGATGTACTAGTTCTGCT               |
| AtCYP72A11-RT-F                                           | ACGATTTACTGGGAATACTTCTTGAATC               |
| AtCYP72A11-RT-R                                           | GGACTAGAAGGATAGGTAGATTGATCAG               |
| AtCYP72A13-RT-F                                           | TCTTGTCGGTGATTTGAAGAGAAAT                  |
| AtCYP72A13-RT-R                                           | GTTGAACACTTCTTTGATTTGCTCA                  |
| AtCYP72A14-RT-F                                           | CAAAAGGGAAAGGGCAAGAGAA                     |
| AtCYP72A14-RT-R                                           | TGGACTACAGGAGGATAAAGCC                     |
| AtCYP72A15-RT-F                                           | CAGAGCTGTAGGGAAGTTGTTG                     |
| AtCYP72A15-RT-R                                           | AAGTATTCCCAGCAAATCGTCG                     |
| BrCYP72A262-RT-F                                          | ATGCTACAAGGATAAAGACAATAGT                  |
| BrCYP72A262-RT-R                                          | CTTGCAATCTTCAATAATTTCTTCG                  |
| BrCYP72A264-RT-F                                          | GTA CT TCTGGTCTGGATAATGATTA                |
| BrCYP72A264-RT-R                                          | CCTCATAAAGAATCATCGTCATAAC                  |
| BrCYP72A272-RT-F                                          | AGGAATTTTAGTATGATGATGGAGG                  |
| BrCYP72A272-RT-R                                          | ATCCATTATAGTGATTGTTGGTGTA                  |
| Br_Actin-RT-F                                             | CTCACTCTCAAGTATCCGATCGAG                   |
| Br_Actin-RT -R                                            | GACGAAGGATAGCATGAGGAAGAG                   |
| Cr_Actin -RT-F                                            | CTCACCCCTGAAGTATCCAATCGAG                  |
| Cr_Actin-RT-R                                             | GATAGCATGAGGAAGAGCATAACC                   |
| CrCYP72A484-RT-F                                          | CTTGAGAGTTATTTGAGAAGACAAG                  |
| CrCYP72A484-RT-R                                          | CATTATAGTGATGGTTGGTATAGGT                  |
| CrCYP72A485-RT-F                                          | CTACAAAGAAGGACAGAGGATATTT                  |
| CrCYP72A485-RT-R                                          | TTTTGTTAATGATCCCTCTCAGTAT                  |
| CrCYP72A486-RT-F                                          | AACTTTGAATGGGTTTTGGT                       |
| CrCYP72A486-RT-R                                          | AAAAAGTCCTTCCGTGAGTC                       |
| CrCYP72A487-RT-F                                          | ACTGTGAGAAGATAAAGAATATGGT                  |

|                                       |                             |
|---------------------------------------|-----------------------------|
| CrCYP72A487-RT-R                      | TGAAATATCCTCTTCCCTTGTTTAT   |
| CrCYP72A488-RT-F                      | TAGTAGCTACGAGGAAGGTAACAGA   |
| CrCYP72A488-RT-R                      | ACATCTTCAATACTCATACCGTGAT   |
| GA2ox1-F                              | TGAGGACGAGAGGTTGTACGA       |
| GA2ox1-R                              | TCCTTTCGAATTGTTGAAGCC       |
| GA2ox2-F                              | CCGGTTCTCACTTCCCAT          |
| GA2ox2-R                              | GCTTCCGGATCGGCTAG           |
| GA2ox3-F                              | AGGAGAAGCTGAGCCGTTT         |
| GA2ox3-R                              | TTCTCCGGGTAATGGTTCAT        |
| GA2ox4-F                              | GGCTCCAAGTGTCCAATTCA        |
| GA2ox4-R                              | TCCTACATTGACGCAGAAAGC       |
| GA2ox6-F                              | GGGACAGAAGTCTAGCGAAGTG      |
| GA2ox6-R                              | TCGCTACGAACGTCTCTGATC       |
| GA2ox7-F                              | AGTAATGGAGTGTACCAAAGCG      |
| GA2ox7-R                              | GAAAGCTATTGACATCCTCTCG      |
| GA2ox8-F                              | GTGTGAGAAATACATGTTATCTAAG   |
| GA2ox8-R                              | TACACCTCCGATGGTTTTGG        |
| GA20ox1-F                             | GATCCATCCTCCACTTTAGA        |
| GA20ox1-R                             | GTGTATTTCATGAGCGTCTGA       |
| GA20ox2-F                             | ACCGAGACTATTTCCGAGGATT      |
| GA20ox2-R                             | TGTTTGGCATGGAGGATAATG       |
| GA20ox3-F                             | AAAGCTCCTTAATCAGCACTCG      |
| GA20ox3-R                             | TGAGTGGGACTTGGAGAGGTT       |
| GA20ox4-F                             | GTCTTGGTATCAAAAGGGAGCAT     |
| GA20ox4-R                             | GCCCCGTACCTAGTACAAGATCT     |
| GA20ox5-F                             | GCTCACGGTACTTTTCTAGTGG      |
| GA20ox5-R                             | ACTCGATATCTCAAGCGCC         |
| GA3ox1-F                              | CCATTCACCTCCCACACTCT        |
| GA3ox1-R                              | GCCAGTGATGGTGAAACCTT        |
| GA3ox2-F                              | TGGTCCGAAGGTTTCAC           |
| GA3ox2-R                              | GGGTTCGAGTCTGTATGG          |
| GA3ox3-F                              | TCCTACCCGGTTTGCC            |
| GA3ox3-R                              | ACGGTGCATTGTACTTC           |
| GA3ox4-F                              | GCCGATGACTCCTACC            |
| GA3ox4-R                              | ACACTTGTAGCCCTCC            |
| GMAT-1-F                              | TGTTGTTTTATGCTGATGGGTGGTC   |
| GMAT-1-R                              | CGCAATCTCTTCGGTGGTTCTAA     |
| GMAT-2-F                              | CGTCCTTCAGGCTCAAGTAGTC      |
| GMAT-2-R                              | CCCTATCTTGAAACCACCACAACGGTC |
| CYP714A1-F                            | TCCGCCGTCGCTATTTCTGT        |
| CYP714A1-R                            | TGTTGTTGTGAGTGATGGCC        |
| CYP714A2-F                            | GTCGGAATCTTCAGCGTAGGTT      |
| CYP714A2-R                            | GGCGTTTGGTGATGTGAGTGA       |
| GID1a-F                               | GATGTCTTGATTGATCGCAGGAT     |
| GID1a-R                               | AGGAGGTTGCTCTTGATCTGCA      |
| GID1c-F                               | CTGTGAATTATCGTCGTGC         |
| GID1c-R                               | GGCTACACGCTGGATG            |
| RGA-F                                 | AGAAGCAATCCAGCAGA           |
| RGA-R                                 | GTGTACTCTCTTCTTACCTTC       |
| <b>For Transgenic Plants Analysis</b> |                             |
| 35S-PROM                              | TCCTTCGCAAGACCCTTC          |
| 35S-TER                               | GAGAGAGACTGGTGATTTTTGCG     |
| GUS-R                                 | CCACCAACGCTGATCAATTCCAC     |



|                                            |                                |
|--------------------------------------------|--------------------------------|
| GFP-R                                      | CCTTGAAGTCGATGCCCTTCAGC        |
| GFP-F                                      | GACCACATGAAGCAGCACGACT         |
| <b>For Cas9-edited Mutant Analysis</b>     |                                |
| At3g14630-target-F                         | ATTGAGAATTACATTCCTGCATAC       |
| At3g14630-target-R                         | ACCCGTATGCAGGAATGTAATTCT       |
| At3g14630-check-F                          | GCATCGAGGTCATGTGTGAATGGGAG     |
| At3g14630-check-R                          | CATGTTTCAGTCCATTCCTTTACTTTGC   |
| <b>For T-DNA Insertion Mutant Analysis</b> |                                |
| SALK_130811C-F                             | GGATGAAAACAATAGTCAAAGAAATCCAAG |
| SALK_130811C-R                             | AGAAGAAGCAGACCTGGTTCTTTGTTGCGC |
| LBb1.3                                     | ATTTTGCCGATTTTCGGAAC           |

1

2

1 **Supplementary Table 2. MRM parameters for GA profiling in Arabidopsis plants.**

| <b>Compound</b>        | <b>MRM transitions (<i>m/z</i>)</b> | <b>CE (V)</b> |
|------------------------|-------------------------------------|---------------|
| <b>GA<sub>12</sub></b> | 331.2 > 313.2                       | -38           |
|                        | 331.2 > 269.2                       | -44           |
| <b>GA<sub>15</sub></b> | 329.1 > 257.1                       | -34           |
|                        | 329.1 > 131.0                       | -40           |
| <b>GA<sub>24</sub></b> | 345.2 > 257.2                       | -36           |
|                        | 345.2 > 213.2                       | -41           |
| <b>GA<sub>9</sub></b>  | 315.1 > 271.1                       | -28           |
|                        | 315.1 > 253.1                       | -35           |
| <b>GA<sub>4</sub></b>  | 331.1 > 257.1                       | -30           |
|                        | 331.1 > 213.1                       | -42           |
| <b>GA<sub>53</sub></b> | 347.2 > 303.2                       | -37           |
|                        | 347.2 > 189.1                       | -48           |
| <b>GA<sub>44</sub></b> | 345.2 > 301.2                       | -35           |
|                        | 345.2 > 273.2                       | -35           |
| <b>GA<sub>19</sub></b> | 361.2 > 273.2                       | -37           |
|                        | 361.2 > 229.1                       | -42           |
| <b>GA<sub>20</sub></b> | 331.1 > 287.1                       | -30           |
|                        | 331.1 > 243.1                       | -26           |
| <b>GA<sub>1</sub></b>  | 347.1 > 273.1                       | -32           |
|                        | 347.1 > 229.1                       | -42           |
| <b>GA<sub>7</sub></b>  | 329.1 > 223.1                       | -27           |
|                        | 329.1 > 211.1                       | -37           |
| <b>GA<sub>3</sub></b>  | 345.1 > 143.1                       | -40           |
|                        | 345.1 > 239.1                       | -20           |
| <b>GA<sub>8</sub></b>  | 363.1 > 275.1                       | -24           |
|                        | 363.1 > 257.1                       | -24           |
| <b>GA<sub>29</sub></b> | 347.1 > 259.1                       | -24           |
|                        | 347.1 > 241.1                       | -32           |
| <b>GA<sub>51</sub></b> | 331.1 > 287.1                       | -24           |
|                        | 331.1 > 243.1                       | -23           |
